# Supplementary material
Source: PubMed Central journal article supplement (PMC7746435)
Supplement: NIHMS1651694-supplement-Palafox__Sarfati_D_supp.pdf [file NIHMS1651694-supplement-Palafox__Sarfati_D_supp.pdf]

# THE LANCET Oncology

## Supplementary appendix

This appendix formed part of the original submission and has been peer reviewed. We post it as supplied by the authors.

Supplement to: Sarfati D, Dyer R, Vivili P, et al. Cancer Control in Small Island Nations 5: Cancer control in small island nations: from local challenges to global action. *Lancet Oncol* 2019; published online Aug 5. [http://dx.doi.org/10.1016/S1470-2045\(19\)30511-X](http://dx.doi.org/10.1016/S1470-2045(19)30511-X).

## **Web appendix: List of acknowledgements**

We thank the following for providing information essential for this work:

We thank the following for providing data relating to AIMS SIDS: Maria Guterres, Alola Maternal and Child Health Program Manager, Alola Foundation, Timor Leste; Dr Hironcina Borges, Medical Oncology Service, Agostinho Neto Hospital, Praia, Cape Verde; Dr Max Parkin, Coordinator, African Cancer Registry Network; Dr Anil Mohith, Medical Oncology Service, Victoria Hospital, Mauritius.
